# Supplementary material for: Clinical characteristics of patients with chronic obstructive pulmonary disease assessed using GOLD 2016 and GOLD 2018 classifications: a cross-sectional study in China
Source: PubMed Central journal article supplement — J Thorac Dis. 2021 Oct;13(10):5701–16. doi: 10.21037/jtd-21-255 (PMC8575805; doi:10.21037/jtd-21-255), 2021-10
Supplement: jtd-13-10-5701-dss.pdf [file jtd-13-10-5701-dss.pdf]

## Data Sharing Statement

|                     |                                                                                                                                                    |                                                                                                                                                                                                |
|---------------------|----------------------------------------------------------------------------------------------------------------------------------------------------|------------------------------------------------------------------------------------------------------------------------------------------------------------------------------------------------|
| <b>Article Info</b> | https://dx.doi.org/10.21037/jtd-21-255                                                                                                             |                                                                                                                                                                                                |
| <b>Item</b>         | <b>Question</b>                                                                                                                                    | <b>Authors' Response<br/>(place "-" if not applicable)</b>                                                                                                                                     |
| 1                   | Would you like to share data collected for your study to others?                                                                                   | Yes                                                                                                                                                                                            |
| 2                   | If not, would you like to share the reason for your decision?                                                                                      | -                                                                                                                                                                                              |
| 3                   | What data in particular will be shared?                                                                                                            | Anonymized participant data                                                                                                                                                                    |
| 4                   | Any other documents will be share? Such as study protocol, statistical analysis plan, informed consent form, clinical study report, analytic code. | No                                                                                                                                                                                             |
| 5                   | When will data availability begin?                                                                                                                 | After the article is published                                                                                                                                                                 |
| 6                   | When will data availability end?                                                                                                                   | -                                                                                                                                                                                              |
| 7                   | To whom will you share the data?                                                                                                                   | Respiratory doctors                                                                                                                                                                            |
| 8                   | For what type of analysis or purpose?                                                                                                              | Discuss the management of COPD or guideline updates for the disease                                                                                                                            |
| 9                   | How or where can the data/documents be obtained?                                                                                                   | Anonymized individual participant data and study documents can be requested for further research from <a href="http://www.clinicalstudydatarequest.com">www.clinicalstudydatarequest.com</a> . |
| 10                  | Any other restrictions?                                                                                                                            | -                                                                                                                                                                                              |
