# Supplementary material for: Clinical characteristics of patients with chronic obstructive pulmonary disease assessed using GOLD 2016 and GOLD 2018 classifications: a cross-sectional study in China
Source: PubMed Central journal article supplement — J Thorac Dis. 2021 Oct;13(10):5701–16. doi: 10.21037/jtd-21-255 (PMC8575805; doi:10.21037/jtd-21-255), 2021-10
Supplement: jtd-13-10-5701-supplementary.pdf [file jtd-13-10-5701-supplementary.pdf]

**Table S1** Demographics and clinical characteristics of patients reclassified to a new group per GOLD 2018 criteria (n=296)

| Characteristic                                         | Total <sup>†</sup> (n=296) | Group C to A <sup>†</sup> (n=52) | Group D to B <sup>§</sup> (n=244) |
|--------------------------------------------------------|----------------------------|----------------------------------|-----------------------------------|
| Age, years, mean (SD)                                  | 65.2 (8.0)                 | 64.4 (8.1)                       | 65.3 (7.9)                        |
| Age group, n (%)                                       |                            |                                  |                                   |
| <65 years                                              | 132 (44.6)                 | 31 (59.6)                        | 101 (41.4)                        |
| ≥65 years                                              | 164 (55.4)                 | 21 (40.4)                        | 143 (58.6)                        |
| Gender, n (%)                                          |                            |                                  |                                   |
| Male                                                   | 265 (89.5)                 | 44 (84.6)                        | 221 (90.6)                        |
| BMI, kg/m <sup>2</sup>                                 |                            |                                  |                                   |
| Mean (SD)                                              | 22.1 (3.4)                 | 22.5 (3.0)                       | 22.0 (3.5)                        |
| BMI group, n (%)                                       |                            |                                  |                                   |
| <18.5                                                  | 39 (13.2)                  | 4 (7.7)                          | 35 (14.3)                         |
| 18.5–23.9                                              | 174 (58.8)                 | 30 (57.7)                        | 144 (59.0)                        |
| 24–27.9                                                | 70 (23.6)                  | 15 (28.8)                        | 55 (22.5)                         |
| ≥28                                                    | 13 (4.4)                   | 3 (5.8)                          | 10 (4.1)                          |
| Waistline measurement, cm                              |                            |                                  |                                   |
| n                                                      | 296                        | 52                               | 244                               |
| Mean (SD)                                              | 85.2 (11.3)                | 82.6 (10.7)                      | 85.7 (11.4)                       |
| Smoking status, n (%)                                  |                            |                                  |                                   |
| Never smoker                                           | 53 (17.9)                  | 11 (21.2)                        | 42 (17.2)                         |
| Former smoker                                          | 175 (59.1)                 | 29 (55.8)                        | 146 (59.8)                        |
| Current smoker                                         | 68 (23.0)                  | 12 (23.1)                        | 56 (23.0)                         |
| Pack-years for former and current smokers <sup>¶</sup> |                            |                                  |                                   |
| n                                                      | 243                        | 41                               | 202                               |
| Mean (SD)                                              | 38.6 (25.2)                | 33.8 (21.6)                      | 39.6 (25.8)                       |
| mMRC dyspnea grade, n (%)                              |                            |                                  |                                   |
| 0                                                      | 17 (5.7)                   | 10 (19.2)                        | 7 (2.9)                           |
| 1                                                      | 103 (34.8)                 | 27 (51.9)                        | 76 (31.1)                         |
| 2                                                      | 108 (36.5)                 | 13 (25.0)                        | 95 (38.9)                         |
| 3                                                      | 63 (21.3)                  | 2 (3.8)                          | 61 (25.0)                         |
| 4                                                      | 5 (1.7)                    | 0                                | 5 (2.0)                           |
| CAT total score, mean (SD)                             | 17.1 (7.7)                 | 5.9 (2.5)                        | 19.5 (6.1)                        |
| CAT total score category, n (%)                        |                            |                                  |                                   |
| 0–<10                                                  | 52 (17.6)                  | 52 (100)                         | 0                                 |
| 10–<20                                                 | 122 (41.2)                 | 0                                | 122 (50.0)                        |
| 20–<30                                                 | 111 (37.5)                 | 0                                | 111 (45.5)                        |
| 30–≤40                                                 | 11 (3.7)                   | 0                                | 11 (4.5)                          |

Table S1 (continued)

Table S1 (continued)

| Characteristic                                                   | Total <sup>†</sup> (n=296) | Group C to A <sup>‡</sup> (n=52) | Group D to B <sup>§</sup> (n=244) |
|------------------------------------------------------------------|----------------------------|----------------------------------|-----------------------------------|
| Exacerbation status, n (%) <sup>††</sup>                         |                            |                                  |                                   |
| No exacerbations                                                 | 271 (91.6)                 | 44 (84.6)                        | 227 (93.0)                        |
| 1 exacerbation (not requiring hospitalization)                   | 25 (8.4)                   | 8 (15.4)                         | 17 (7.0)                          |
| ≥1 exacerbation requiring hospitalization                        | 0                          | 0                                | 0                                 |
| ≥2 exacerbations                                                 | 0                          | 0                                | 0                                 |
| ≥1 exacerbation requiring hospitalization or<br>≥2 exacerbations | 0                          | 0                                | 0                                 |
| Spirometry classification, n (%) <sup>††</sup>                   |                            |                                  |                                   |
| GOLD 1                                                           | 0                          | 0                                | 0                                 |
| GOLD 2                                                           | 0                          | 0                                | 0                                 |
| GOLD 3                                                           | 209 (70.6)                 | 50 (96.2)                        | 159 (65.2)                        |
| GOLD 4                                                           | 87 (29.4)                  | 2 (3.8)                          | 5 (34.8)                          |
| FEV <sub>1</sub> , L, mean (SD)                                  | 0.96 (0.3)                 | 1.08 (0.2)                       | 0.94 (0.3)                        |
| FEV <sub>1</sub> /FVC ratio, mean (SD)                           | 0.40 (0.1)                 | 0.41 (0.1)                       | 0.40 (0.1)                        |
| FEV <sub>1</sub> % predicted, mean (SD)                          | 35.82 (9.2)                | 40.91 (6.3)                      | 34.73 (9.4)                       |

<sup>†</sup>, Group C per GOLD 2016 reclassified to Group A per GOLD 2018 + Group D per GOLD 2016 reclassified to Group B per GOLD 2018.

<sup>‡</sup>, Group C per GOLD 2016 reclassified to Group A per GOLD 2018. <sup>§</sup>, Group D per GOLD 2016 reclassified to Group B per GOLD 2018.

<sup>¶</sup>, pack-years = number of packs per day × number of smoking years. <sup>††</sup>, exacerbations in the last 12 months. <sup>‡‡</sup>, GOLD 1: mild, FEV<sub>1</sub> ≥ 80% predicted; GOLD 2: moderate, 50% ≤ FEV<sub>1</sub> < 80% predicted; GOLD 3: severe, 30% ≤ FEV<sub>1</sub> < 50% predicted; GOLD 4: very severe, FEV<sub>1</sub> < 30% predicted. Spirometry was only considered in the GOLD 2016 classification, not in the GOLD 2018 classification. BMI, body mass index; CAT, COPD Assessment Test; COPD, chronic obstructive pulmonary disease; FEV<sub>1</sub>, forced expiratory volume in 1 second; FVC, forced vital capacity; GOLD, Global Initiative for Chronic Obstructive Lung Disease; mMRC, modified Medical Research Council; SD, standard deviation.

**Table S2** Proportion of patients receiving treatment and concordance with treatment recommendations per GOLD 2016 (N=838)

|                                                                                            | Total       | GOLD 2016  |            |           |            | GOLD 2018  |            |           |            |
|--------------------------------------------------------------------------------------------|-------------|------------|------------|-----------|------------|------------|------------|-----------|------------|
|                                                                                            |             | Group A    | Group B    | Group C   | Group D    | Group A    | Group B    | Group C   | Group D    |
| Patients, n (%)                                                                            | 838 (100.0) | 162 (19.3) | 236 (28.2) | 81 (9.7)  | 359 (42.8) | 214 (25.5) | 480 (57.3) | 29 (3.5)  | 115 (13.7) |
| Patients receiving treatment concordant with GOLD 2016 recommendations, n (%)              | 303 (36.2)  | 24 (14.8)  | 18 (7.6)   | 39 (48.1) | 222 (61.8) | N/A        | N/A        | N/A       | N/A        |
| Patients receiving treatment concordant with the GOLD 2016 recommended first choice, n (%) | 275 (32.8)  | 0          | 16 (6.8)   | 38 (46.9) | 221 (61.6) | N/A        | N/A        | N/A       | N/A        |
| Patients receiving treatment concordant with the GOLD 2016 alternative choice, n (%)       | 249 (29.7)  | 24 (14.8)  | 2 (0.8)    | 1 (1.2)   | 222 (61.8) | N/A        | N/A        | N/A       | N/A        |
| COPD inhaled medications, n (%)                                                            |             |            |            |           |            |            |            |           |            |
| None                                                                                       | 286 (34.1)  | 55 (34.0)  | 94 (39.8)  | 11 (13.6) | 126 (35.1) | 65 (30.4)  | 175 (36.5) | 1 (3.4)   | 45 (39.1)  |
| ICS + LABA                                                                                 | 231 (27.6)  | 44 (27.2)  | 69 (29.2)  | 27 (33.3) | 91 (25.3)  | 59 (27.6)  | 124 (25.8) | 12 (41.4) | 36 (31.3)  |
| ICS + LAMA + LABA                                                                          | 217 (25.9)  | 35 (21.6)  | 45 (19.1)  | 31 (38.3) | 106 (29.5) | 55 (25.7)  | 124 (25.8) | 11 (37.9) | 27 (23.5)  |
| LAMA                                                                                       | 75 (8.9)    | 24 (14.8)  | 16 (6.8)   | 11 (13.6) | 24 (6.7)   | 31 (14.5)  | 36 (7.5)   | 4 (13.8)  | 4 (3.5)    |
| Other <sup>†</sup>                                                                         | 12 (1.4)    | 2 (1.2)    | 5 (2.1)    | 0         | 5 (1.4)    | 2 (0.9)    | 8 (1.7)    | 0         | 2 (1.7)    |
| SABA                                                                                       | 7 (0.8)     | 0          | 5 (2.1)    | 0         | 2 (0.6)    | 0          | 7 (1.5)    | 0         | 0          |
| LAMA + LABA                                                                                | 6 (0.7)     | 2 (1.2)    | 2 (0.8)    | 1 (1.2)   | 1 (0.3)    | 2 (0.9)    | 3 (0.6)    | 1 (3.4)   | 0          |
| SAMA + SABA                                                                                | 2 (0.2)     | 0          | 0          | 0         | 2 (0.6)    | 0          | 2 (0.4)    | 0         | 0          |
| LABA                                                                                       | 1 (0.1)     | 0          | 0          | 0         | 1 (0.3)    | 0          | 1 (0.2)    | 0         | 0          |
| SAMA                                                                                       | 1 (0.1)     | 0          | 0          | 0         | 1 (0.3)    | 0          | 0          | 0         | 1 (0.9)    |

<sup>†</sup>, the types of medication included in the “Other” category were not captured. COPD, chronic obstructive pulmonary disease; GOLD, Global Initiative for Chronic Obstructive Lung Disease; ICS, inhaled corticosteroid; LABA, long-acting  $\beta_2$ -agonist; LAMA, long-acting muscarinic antagonist; N/A, not applicable; SABA, short-acting  $\beta_2$ -agonist; SAMA, short-acting muscarinic antagonist.

**Table S3** Patient demographics and clinical characteristics by COPD inhaled medications (N=838)

| Characteristic                                         | Total (N=838) | LAMA or LABA (n=76) | LAMA + LABA (n=6) | ICS + LABA (n=231) | ICS + LAMA + LABA (n=217) | Other <sup>†</sup> (n=22) | No current COPD treatment (n=286) |
|--------------------------------------------------------|---------------|---------------------|-------------------|--------------------|---------------------------|---------------------------|-----------------------------------|
| Age, years, mean (SD)                                  | 65.7 (8.6)    | 66.6 (7.2)          | 59.3 (8.8)        | 66.6 (8.5)         | 66.8 (8.3)                | 65.1 (6.5)                | 63.9 (9.0)                        |
| Age group, n (%)                                       |               |                     |                   |                    |                           |                           |                                   |
| <65 years                                              | 347 (41.4)    | 25 (32.9)           | 4 (66.7)          | 103 (44.6)         | 84 (38.7)                 | 8 (36.4)                  | 123 (43.0)                        |
| ≥65 years                                              | 491 (58.6)    | 51 (67.1)           | 2 (33.3)          | 128 (55.4)         | 133 (61.3)                | 14 (63.6)                 | 163 (57.0)                        |
| Gender, n (%)                                          |               |                     |                   |                    |                           |                           |                                   |
| Male                                                   | 724 (86.4)    | 67 (88.2)           | 5 (83.3)          | 206 (89.2)         | 200 (92.2)                | 19 (86.4)                 | 227 (79.4)                        |
| BMI, kg/m <sup>2</sup>                                 |               |                     |                   |                    |                           |                           |                                   |
| n                                                      | 836           | 76                  | 6                 | 231                | 216                       | 21                        | 286                               |
| Mean (SD)                                              | 23.1 (3.6)    | 22.4 (3.3)          | 23.6 (1.0)        | 23.2 (3.7)         | 22.7 (3.6)                | 22.3 (3.5)                | 23.5 (3.7)                        |
| BMI group, n (%)                                       |               |                     |                   |                    |                           |                           |                                   |
| <18.5                                                  | 78 (9.3)      | 9 (11.8)            | 0                 | 18 (7.8)           | 26 (12.0)                 | 2 (9.5)                   | 23 (8.0)                          |
| 18.5–23.9                                              | 434 (51.9)    | 44 (57.9)           | 4 (66.7)          | 125 (54.1)         | 110 (50.9)                | 14 (66.7)                 | 137 (47.9)                        |
| 24.0–27.9                                              | 250 (29.9)    | 21 (27.6)           | 2 (33.3)          | 68 (29.4)          | 64 (29.6)                 | 3 (14.3)                  | 92 (32.2)                         |
| ≥28                                                    | 74 (8.9)      | 2 (2.6)             | 0                 | 20 (8.7)           | 16 (7.4)                  | 2 (9.5)                   | 34 (11.9)                         |
| Missing                                                | 2 (0.2)       | 0                   | 0                 | 0                  | 1 (0.4)                   | 1 (4.5)                   | 0                                 |
| Waistline measurement, cm                              |               |                     |                   |                    |                           |                           |                                   |
| n                                                      | 834           | 76                  | 6                 | 229                | 216                       | 21                        | 286                               |
| Mean (SD)                                              | 86.5 (10.3)   | 84.0 (11.3)         | 90.5 (11.9)       | 87.04 (10.1)       | 87.8 (11.5)               | 85.3 (11.3)               | 85.8 (8.9)                        |
| Smoking status, n (%)                                  |               |                     |                   |                    |                           |                           |                                   |
| Never smoker                                           | 180 (21.5)    | 12 (15.8)           | 1 (16.7)          | 44 (19.0)          | 39 (18.0)                 | 3 (13.6)                  | 81 (28.3)                         |
| Former smoker                                          | 449 (53.6)    | 45 (59.2)           | 3 (50.0)          | 129 (55.8)         | 124 (57.1)                | 14 (63.6)                 | 134 (46.9)                        |
| Current smoker                                         | 209 (24.9)    | 19 (25.0)           | 2 (33.3)          | 58 (25.1)          | 54 (24.9)                 | 5 (22.7)                  | 71 (24.8)                         |
| Pack-years for former and current smokers <sup>‡</sup> |               |                     |                   |                    |                           |                           |                                   |
| n                                                      | 658           | 64                  | 5                 | 187                | 178                       | 19                        | 205                               |
| Mean (SD)                                              | 39.05 (25.8)  | 41.04 (28.8)        | 54.0 (19.5)       | 37.4 (24.4)        | 41.9 (29.4)               | 35.7 (17.3)               | 37.5 (23.2)                       |
| mMRC dyspnea grade <sup>§</sup> , n (%)                |               |                     |                   |                    |                           |                           |                                   |
| 0                                                      | 120 (14.3)    | 12 (15.8)           | 2 (33.3)          | 42 (18.2)          | 18 (8.3)                  | 2 (9.1)                   | 44 (15.4)                         |
| 1                                                      | 316 (37.7)    | 38 (50.0)           | 3 (50.0)          | 92 (39.8)          | 81 (37.3)                 | 10 (45.5)                 | 92 (32.2)                         |
| 2                                                      | 269 (32.1)    | 22 (28.9)           | 1 (16.7)          | 68 (29.4)          | 83 (38.2)                 | 4 (18.2)                  | 91 (31.8)                         |
| 3                                                      | 120 (14.3)    | 3 (3.9)             | 0                 | 25 (10.8)          | 30 (13.8)                 | 4 (18.2)                  | 58 (20.3)                         |
| 4                                                      | 13 (1.6)      | 1 (1.3)             | 0                 | 4 (1.7)            | 5 (2.3)                   | 2 (9.1)                   | 1 (0.3)                           |
| CAT total score, mean (SD)                             | 15.0 (8.0)    | 11.5 (6.7)          | 11.2 (4.9)        | 14.4 (7.9)         | 14.8 (8.0)                | 17.7 (7.0)                | 16.4 (8.0)                        |
| CAT total score category, n (%)                        |               |                     |                   |                    |                           |                           |                                   |
| 0–<10                                                  | 243 (29.0)    | 35 (46.1)           | 3 (50.0)          | 71 (30.7)          | 66 (30.4)                 | 2 (9.1)                   | 66 (23.1)                         |
| 10–<20                                                 | 345 (41.2)    | 30 (39.5)           | 3 (50.0)          | 96 (41.6)          | 86 (39.6)                 | 11 (50.0)                 | 119 (41.6)                        |
| 20–<30                                                 | 221 (26.4)    | 11 (14.5)           | 0                 | 59 (25.5)          | 55 (25.3)                 | 9 (40.9)                  | 87 (30.4)                         |
| 30–≤40                                                 | 29 (3.5)      | 0                   | 0                 | 5 (2.2)            | 10 (4.6)                  | 0                         | 14 (4.9)                          |

Table S3 (continued)

Table S3 (continued)

| Characteristic                                                | Total (N=838) | LAMA or LABA (n=76) | LAMA + LABA (n=6) | ICS + LABA (n=231) | ICS + LAMA + LABA (n=217) | Other <sup>†</sup> (n=22) | No current COPD treatment (n=286) |
|---------------------------------------------------------------|---------------|---------------------|-------------------|--------------------|---------------------------|---------------------------|-----------------------------------|
| Exacerbation status, n (%) <sup>¶</sup>                       |               |                     |                   |                    |                           |                           |                                   |
| No exacerbations                                              | 628 (74.9)    | 59 (77.6)           | 4 (66.7)          | 157 (68.0)         | 158 (72.8)                | 16 (72.7)                 | 234 (81.8)                        |
| 1 exacerbation (not requiring hospitalization)                | 64 (7.6)      | 9 (11.8)            | 1 (16.7)          | 26 (11.3)          | 21 (9.7)                  | 3 (13.6)                  | 4 (1.4)                           |
| ≥1 exacerbation requiring hospitalization                     | 118 (14.1)    | 5 (6.6)             | 1 (16.7)          | 33 (14.3)          | 31 (14.3)                 | 3 (13.6)                  | 45 (15.7)                         |
| ≥2 exacerbations                                              | 46 (5.5)      | 4 (5.3)             | 0                 | 22 (9.5)           | 14 (6.5)                  | 1 (4.5)                   | 5 (1.7)                           |
| ≥1 exacerbation requiring hospitalization or ≥2 exacerbations | 144 (17.2)    | 8 (10.5)            | 1 (16.7)          | 48 (20.8)          | 38 (17.5)                 | 3 (13.6)                  | 46 (16.1)                         |
| Spirometry classification, n (%)                              |               |                     |                   |                    |                           |                           |                                   |
| GOLD 1                                                        | 77 (9.2)      | 5 (6.6)             | 1 (16.7)          | 26 (11.3)          | 8 (3.7)                   | 2 (9.1)                   | 35 (12.2)                         |
| GOLD 2                                                        | 373 (44.5)    | 37 (48.7)           | 3 (50.0)          | 114 (49.4)         | 81 (37.3)                 | 10 (45.5)                 | 128 (44.8)                        |
| GOLD 3                                                        | 275 (32.8)    | 24 (31.6)           | 2 (33.3)          | 63 (27.3)          | 92 (42.4)                 | 7 (31.8)                  | 87 (30.4)                         |
| GOLD 4                                                        | 113 (13.5)    | 10 (13.2)           | 0 (0.0)           | 28 (12.1)          | 36 (16.6)                 | 3 (13.6)                  | 36 (12.6)                         |
| FEV <sub>1</sub> , L, mean (SD)                               | 1.39 (0.6)    | 1.35 (0.5)          | 1.88 (0.8)        | 1.45 (0.6)         | 1.26 (0.5)                | 1.45 (0.6)                | 1.44 (0.6)                        |
| FEV <sub>1</sub> /FVC ratio, mean (SD)                        | 0.49 (0.12)   | 0.48 (0.12)         | 0.53 (0.12)       | 0.50 (0.12)        | 0.46 (0.11)               | 0.46 (0.14)               | 0.51 (0.11)                       |
| FEV <sub>1</sub> % predicted, mean (SD)                       | 52.7 (19.4)   | 52.1 (17.4)         | 60.5 (19.7)       | 55.2 (19.9)        | 47.4 (17.3)               | 53.1 (19.2)               | 54.7 (20.4)                       |
| GOLD 2016, n (%)                                              |               |                     |                   |                    |                           |                           |                                   |
| Group A                                                       | 162 (19.3)    | 24 (31.6)           | 2 (33.3)          | 44 (19.0)          | 35 (16.1)                 | 2 (9.1)                   | 55 (19.2)                         |
| Group B                                                       | 236 (28.2)    | 16 (21.1)           | 2 (33.3)          | 69 (29.9)          | 45 (20.7)                 | 10 (45.5)                 | 94 (32.9)                         |
| Group C                                                       | 81 (9.7)      | 11 (14.5)           | 1 (16.7)          | 27 (11.7)          | 31 (14.3)                 | 0 (0.0)                   | 11 (3.8)                          |
| Group D                                                       | 359 (42.8)    | 25 (32.9)           | 1 (16.7)          | 91 (39.4)          | 106 (48.8)                | 10 (45.5)                 | 126 (44.1)                        |
| GOLD 2018, n (%)                                              |               |                     |                   |                    |                           |                           |                                   |
| Group A                                                       | 214 (25.5)    | 31 (40.8)           | 2 (33.3)          | 59 (25.5)          | 55 (25.3)                 | 2 (9.1)                   | 65 (22.7)                         |
| Group B                                                       | 480 (57.3)    | 37 (48.7)           | 3 (50.0)          | 124 (53.7)         | 124 (57.1)                | 17 (77.3)                 | 175 (61.2)                        |
| Group C                                                       | 29 (3.5)      | 4 (5.3)             | 1 (16.7)          | 12 (5.2)           | 11 (5.1)                  | 0 (0.0)                   | 1 (0.3)                           |
| Group D                                                       | 115 (13.7)    | 4 (5.3)             | 0 (0.0)           | 36 (15.6)          | 27 (12.4)                 | 3 (13.6)                  | 45 (15.7)                         |

<sup>†</sup>, patients receiving SABA (n=7), SAMA + SABA (n=2), and SAMA (n=1) are grouped with "Other" (n=12) in the above due to small patient numbers in these categories. The types of medication included in the "Other" category (n=12) were not captured. <sup>‡</sup>, pack-years = number of packs per day × number of smoking years. <sup>§</sup>, Grade 0, breathless only with strenuous exercise; grade 1, breathless when hurrying on the level or walking on a slight hill; grade 2, walks slower than people of the same age on the level because of breathlessness or has to stop when walking at own pace on the level; grade 3, stops for breath after walking 100 m or after a few minutes on the level; grade 4, too breathless to leave the house or breathless when dressing or undressing. <sup>¶</sup>, exacerbations in the last 12 months. BMI, body mass index; CAT, COPD Assessment Test; COPD, chronic obstructive pulmonary disease; FEV<sub>1</sub>, forced expiratory volume in 1 second; FVC, forced vital capacity; GOLD, Global Initiative for Chronic Obstructive Lung Disease; ICS, inhaled corticosteroid; LABA, long-acting β<sub>2</sub>-agonist; LAMA, long-acting muscarinic antagonist; mMRC, modified Medical Research Council; SABA, short-acting β<sub>2</sub>-agonist; SAMA, short-acting muscarinic antagonist; SD, standard deviation.

## GOLD 2016

|                                      |   |    |                        |
|--------------------------------------|---|----|------------------------|
| GOLD airflow limitation <sup>†</sup> | 4 | ≥2 | Exacerbation frequency |
|                                      | 3 | 1  | 0                      |
| 2                                    | 1 |    |                        |
| 1                                    |   |    |                        |

|                                                                                                                                                                                                                                                                |                                                                                                                                                                                                                                                            |
|----------------------------------------------------------------------------------------------------------------------------------------------------------------------------------------------------------------------------------------------------------------|------------------------------------------------------------------------------------------------------------------------------------------------------------------------------------------------------------------------------------------------------------|
| <p style="text-align: center;"><b>GOLD Group C</b><br/><b>GOLD 3 or GOLD 4</b><br/><i>AND/OR</i><br/>mMRC dyspnea grade 0–1<br/>or CAT score &lt;10<br/><i>AND</i><br/>Exacerbation frequency ≥2<br/>or ≥1 hospitalization for<br/>exacerbation per year</p>   | <p style="text-align: center;"><b>GOLD Group D</b><br/><b>GOLD 3 or GOLD 4</b><br/><i>AND/OR</i><br/>mMRC dyspnea grade ≥2 or<br/>CAT score ≥10<br/><i>AND</i><br/>Exacerbation frequency ≥2<br/>or ≥1 hospitalization for<br/>exacerbation per year</p>   |
| <p style="text-align: center;"><b>GOLD Group A</b><br/><b>GOLD 1 or GOLD 2</b><br/><i>AND/OR</i><br/>mMRC dyspnea grade 0–1<br/>or CAT score &lt;10<br/><i>AND</i><br/>Exacerbation frequency 0–1<br/>and no hospitalization for<br/>exacerbation per year</p> | <p style="text-align: center;"><b>GOLD Group B</b><br/><b>GOLD 1 or GOLD 2</b><br/><i>AND/OR</i><br/>mMRC dyspnea grade ≥2 or<br/>CAT score ≥10<br/><i>AND</i><br/>Exacerbation frequency 0–1<br/>and no hospitalization for<br/>exacerbation per year</p> |
| mMRC dyspnea grade 0 or 1<br>or CAT score <10                                                                                                                                                                                                                  | mMRC dyspnea grade ≥2<br>or CAT score ≥10                                                                                                                                                                                                                  |
| <b>Symptoms</b>                                                                                                                                                                                                                                                |                                                                                                                                                                                                                                                            |

## GOLD 2018

|                        |    |   |   |
|------------------------|----|---|---|
| Exacerbation frequency | ≥2 | 1 | 0 |
|                        | 1  |   |   |
| 0                      |    |   |   |

|                                                                                                                                                                                                                     |                                                                                                                                                                                                                 |
|---------------------------------------------------------------------------------------------------------------------------------------------------------------------------------------------------------------------|-----------------------------------------------------------------------------------------------------------------------------------------------------------------------------------------------------------------|
| <p style="text-align: center;"><b>GOLD Group C</b></p> <p>mMRC dyspnea grade 0–1<br/>or CAT score &lt;10<br/><i>AND</i><br/>Exacerbation frequency ≥2<br/>or ≥1 hospitalization for<br/>exacerbation per year</p>   | <p style="text-align: center;"><b>GOLD Group D</b></p> <p>mMRC dyspnea grade ≥2 or<br/>CAT score ≥10<br/><i>AND</i><br/>Exacerbation frequency ≥2<br/>or ≥1 hospitalization for<br/>exacerbation per year</p>   |
| <p style="text-align: center;"><b>GOLD Group A</b></p> <p>mMRC dyspnea grade 0–1<br/>or CAT score &lt;10<br/><i>AND</i><br/>Exacerbation frequency 0–1<br/>and no hospitalization for<br/>exacerbation per year</p> | <p style="text-align: center;"><b>GOLD Group B</b></p> <p>mMRC dyspnea grade ≥2 or<br/>CAT score ≥10<br/><i>AND</i><br/>Exacerbation frequency 0–1<br/>and no hospitalization for<br/>exacerbation per year</p> |
| mMRC dyspnea grade 0 or 1<br>or CAT score <10                                                                                                                                                                       | mMRC dyspnea grade ≥2<br>or CAT score ≥10                                                                                                                                                                       |
| <b>Symptoms</b>                                                                                                                                                                                                     |                                                                                                                                                                                                                 |

**Figure S1** ABCD classification criteria for GOLD 2016 and GOLD 2018. <sup>†</sup>, GOLD 1: mild, FEV<sub>1</sub> ≥ 80% predicted; GOLD 2: moderate, 50% ≤ FEV<sub>1</sub> < 80% predicted; GOLD 3: severe, 30% ≤ FEV<sub>1</sub> < 50% predicted; GOLD 4: very severe, FEV<sub>1</sub> < 30% predicted. Only considered for GOLD 2016 criteria. CAT, COPD Assessment Test; COPD, chronic obstructive pulmonary disease; FEV<sub>1</sub>, forced expiratory volume in 1 second; GOLD, Global Initiative for Chronic Obstructive Lung Disease; mMRC, modified Medical Research Council.
